# Supplementary material
Source: publisher site journal article supplement (https://www.degruyterbrill.com/publication/isbn/9783110330007/downloadAsset/9783110330007_Inhaltsverzeichnis.pdf)
Supplement: Supplementary file 1 [file 9783110330007_Inhaltsverzeichnis.pdf]

# Inhalt

**Vorwort — VII**

**Hinweise für die Benutzung — X**

**1 Wortschatz — X**

1. 1 Korpus-Bibliographie — X

1. 2 Auswahl der Lemmata — XIV

**2 Artikel — XV**

2. 1. Lemma — XV

2. 2 Alphabetische Ordnung — XV

2. 3 Normalisierung — XV

2. 4 Nebenformen und Verweise — XVII

2. 5 Grammatische Angaben — XVII

2. 6 Bedeutungsangaben — XVIII

2. 7 Valenz der Verben — XIX

**3 Siglen und Abkürzungen — XX**

**4 Zeichen — XXIV**

**5 Verbtabelle — XXV**

5. 1 Ablautreihen der starken Verben — XXV

5. 2 Starke/schwache Mischkonjugation — XXVI

5. 3 Anomale Verben — XXVI

5. 4 Kontrahierte Verben — XXVII

5. 5 Verb-Konjugation – schwache Verben — XXVIII

**6 Substantiv-Deklination — XXIX**

6. 1 Starke Deklination — XXIX

6. 2 Schwache Deklination — XXIX

**Wörterbuch — 1**
